# Supplementary material for: Association of Coffee Consumption and Its Types According to Addition of Sugar and Creamer with Metabolic Syndrome Incidence in a Korean Population from the Health Examinees (HEXA) Study
Source: PubMed Central journal article supplement (PMC8001379; doi:10.3390/nu13030920), 2021-03-12
Supplement: nutrients-13-00920-s001.pdf [file nutrients-13-00920-s001.pdf]

**Supplementary Materials**
**Table S1.** General characteristics of participants based on coffee consumption (cups/day) by sex.

|                            | COFFEE CONSUMPTION (CUPS/DAY) |                |                |               | <i>p</i> value |
|----------------------------|-------------------------------|----------------|----------------|---------------|----------------|
|                            | 0                             | ≤1             | 1–3            | > 3           |                |
| <b>Men (N=3,897)</b>       |                               |                |                |               |                |
| N (incidence %)            | 276 (3.99%)                   | 1,071 (4.95%)  | 1,853 (5.45%)  | 697 (4.88%)   |                |
| Age (years)                | 55.69 ± 0.50                  | 54.87 ± 0.26   | 53.75 ± 0.20   | 50.68 ± 0.29  | <.0001         |
| 40–49                      | 68 (24.64%)                   | 305 (28.48%)   | 626 (33.78%)   | 320 (45.91%)  | <.0001         |
| 50–59                      | 107 (38.77%)                  | 391 (36.51%)   | 696 (37.56%)   | 275 (39.45%)  |                |
| 60–69                      | 95 (34.42%)                   | 352 (32.87%)   | 503 (27.15%)   | 97 (13.92%)   |                |
| 70–79                      | 6 (2.17%)                     | 23 (2.15%)     | 28 (1.51%)     | 5 (0.72 %)    |                |
| BMI (kg/m <sup>2</sup> )   | 21.85 ± 0.13                  | 22.53 ± 0.07   | 22.80 ± 0.05   | 22.83 ± 0.08  | <.0001         |
| < 18.5                     | 23 (8.33%)                    | 44 (4.11%)     | 52 (2.81%)     | 16 (2.30%)    | <.0001         |
| 18.5–25                    | 227 (82.25%)                  | 878 (81.98%)   | 1,466 (79.11%) | 536 (76.90%)  |                |
| ≥ 25                       | 26 (9.42%)                    | 149 (13.91%)   | 335 (18.08%)   | 145 (20.80%)  |                |
| Waist circumference (cm)   | 79.00 ± 0.36                  | 80.04 ± 0.17   | 80.72 ± 0.13   | 80.37 ± 0.22  | <.0001         |
| Smoking                    |                               |                |                |               | <.0001         |
| Non-smoker                 | 145 (52.54%)                  | 495 (46.22%)   | 602 (32.49%)   | 142 (20.37%)  |                |
| Past smoker                | 110 (39.86%)                  | 410 (38.28%)   | 752 (40.58%)   | 225 (32.28%)  |                |
| Current smoker             | 18 (6.52%)                    | 163 (15.22%)   | 493 (26.61%)   | 325 (46.63%)  |                |
| Physical activity (yes, %) | 138 (50.00%)                  | 564 (52.66%)   | 1,082 (58.39%) | 452 (64.85%)  | <.0001         |
| Educational level          |                               |                |                |               | 0.0203         |
| Under middle school        | 49 (17.75%)                   | 214 (19.98%)   | 372 (20.08%)   | 123 (17.65%)  |                |
| High school                | 106 (38.41%)                  | 372 (34.73%)   | 679 (36.64%)   | 308 (44.19%)  |                |
| College or above           | 117 (42.39%)                  | 474 (44.26%)   | 788 (42.53%)   | 260 (37.30%)  |                |
| Drinking status (yes, %)   | 126 (45.65%)                  | 323 (30.16%)   | 451 (24.34%)   | 199 (28.55%)  | <.0001         |
| <b>Biomarkers</b>          |                               |                |                |               |                |
| TG (mg/dL)                 | 83.42 ± 1.72                  | 86.08 ± 0.95   | 88.80 ± 0.69   | 89.38 ± 1.11  | 0.0632         |
| HDL-C (mg/dL)              | 54.80 ± 0.69                  | 55.20 ± 0.33   | 54.76 ± 0.25   | 53.87 ± 0.39  | 0.0717         |
| FPG (mg/dL)                | 87.92 ± 0.42                  | 87.96 ± 0.21   | 88.58 ± 0.15   | 87.67 ± 0.27  | 0.0113         |
| SBP (mmHg)                 | 115.05 ± 0.51                 | 114.62 ± 0.26  | 114.97 ± 0.20  | 114.43 ± 0.34 | 0.5381         |
| DBP (mmHg)                 | 72.53 ± 0.42                  | 72.33 ± 0.21   | 72.36 ± 0.16   | 72.02 ± 0.26  | 0.7748         |
| <b>Women (N=10,725)</b>    |                               |                |                |               |                |
| N (incidence %)            | 1,119 (3.13%)                 | 3,390 (2.92%)  | 5,234 (3.27%)  | 9,82 (3.56%)  |                |
| Age (years)                | 52.37 ± 0.21                  | 50.36 ± 0.12   | 48.53 ± 0.09   | 46.64 ± 0.18  | <.0001         |
| 40–49                      | 401 (35.84%)                  | 1600 (47.20%)  | 3067 (58.60%)  | 700 (71.28%)  | <.0001         |
| 50–59                      | 523 (46.74%)                  | 1,427 (42.09%) | 1,844 (35.23%) | 251 (25.56%)  |                |
| 60–69                      | 188 (16.80%)                  | 351 (10.35%)   | 317 (6.06%)    | 31 (3.16%)    |                |
| 70–79                      | 7 (0.63%)                     | 12 (0.35%)     | 6 (0.11%)      | 0 (0%)        |                |
| BMI (kg/m <sup>2</sup> )   | 21.20 ± 0.06                  | 21.72 ± 0.03   | 21.78 ± 0.03   | 21.72 ± 0.06  | <.0001         |
| < 18.5                     | 97 (8.67%)                    | 179 (5.28%)    | 224 (4.28%)    | 38 (3.87%)    | <.0001         |
| 18.5–25                    | 980 (87.58%)                  | 2,971 (87.64%) | 4,557 (87.07%) | 846 (86.15%)  |                |
| ≥ 25                       | 42 (3.75%)                    | 240 (7.08%)    | 453 (8.65%)    | 98 (9.98%)    |                |
| Waist circumference (cm)   | 71.59 ± 0.15                  | 72.01 ± 0.08   | 71.82 ± 0.07   | 71.51 ± 0.15  | 0.0283         |
| Smoking                    |                               |                |                |               | <.0001         |

|                            |                |                |                |               |        |
|----------------------------|----------------|----------------|----------------|---------------|--------|
| Non-smoker                 | 1,107 (98.93%) | 3,316 (97.82%) | 5,077 (97.00%) | 904 (92.06%)  |        |
| Past smoker                | 5 (0.45%)      | 29 (0.86%)     | 53 (1.01%)     | 11 (1.12%)    |        |
| Current smoker             | 5 (0.45%)      | 30 (0.88%)     | 78 (1.49%)     | 65 (6.62%)    |        |
| Physical activity (yes, %) | 628 (56.12%)   | 1916 (56.52%)  | 3,063 (58.52%) | 617 (62.83%)  | 0.0025 |
| Educational level          |                |                |                |               | <.0001 |
| Under middle school        | 339 (30.29%)   | 843 (24.87%)   | 919 (17.56%)   | 118 (12.02%)  |        |
| High school                | 492 (43.97%)   | 1,667 (49.17%) | 2,638 (50.40%) | 456 (46.44%)  |        |
| College or above           | 272 (24.31%)   | 853 (25.16%)   | 1,639 (31.31%) | 403 (41.04%)  |        |
| Drinking status (yes, %)   | 945 (84.45%)   | 2,374 (70.03%) | 2,979 (56.92%) | 523 (53.26%)  | <.0001 |
| Biomarkers                 |                |                |                |               |        |
| TG (mg/dL)                 | 77.43 ± 0.84   | 75.59 ± 0.48   | 74.87 ± 0.38   | 70.52 ± 0.83  | <.0001 |
| HDL-C (mg/dL)              | 63.41 ± 0.31   | 63.91 ± 0.18   | 64.24 ± 0.15   | 65.20 ± 0.34  | 0.0734 |
| FPG (mg/dL)                | 86.13 ± 0.21   | 86.18 ± 0.12   | 86.02 ± 0.09   | 85.25 ± 0.22  | 0.0059 |
| SBP (mmHg)                 | 111.63 ± 0.30  | 111.20 ± 0.16  | 111.16 ± 0.13  | 110.23 ± 0.30 | 0.0533 |
| DBP (mmHg)                 | 69.66 ± 0.22   | 69.58 ± 0.12   | 69.48 ± 0.10   | 68.63 ± 0.23  | 0.0031 |

<sup>1</sup> *p* value of continuous variables (presented as mean ± standard error) was calculated using general linear models, and the *p* value of categorical variables (presented as n (%)) was calculated by chi-square test. The same alphabet in same treatment row shows insignificant differences based on Duncan test. Physical inactivity was defined as doing over 30 min exercise less than twice a week. BMI, body mass index; -TG, triglyceride; HDL-C, high-density lipoprotein cholesterol; FPG, fasting plasma glucose; SBP, systolic blood pressure; DBP, diastolic blood pressure.

**Table S2.** General characteristics of participants based on change of coffee consumption pattern by sex.

|                            | COFFEE CONSUMPTION PATTERN CHANGE |                            |                            |                            | p value |
|----------------------------|-----------------------------------|----------------------------|----------------------------|----------------------------|---------|
|                            | Non to Non                        | Non to Coffee              | Coffee to Non              | Coffee to coffee           |         |
| <b>Men (N=3,897)</b>       |                                   |                            |                            |                            |         |
| N (incidence %)            | 276 (3.99%)                       | 262 (6.87%)                | 200 (5.50%)                | 3,159 (5.03%)              |         |
| Age (years)                | 55.69 ± 0.50 <sup>a</sup>         | 54.87 ± 0.53 <sup>a</sup>  | 55.01 ± 0.59 <sup>a</sup>  | 53.28 ± 0.15 <sup>b</sup>  | 0.0006  |
| 40–49                      | 68 (24.64%)                       | 79 (30.15%)                | 59 (29.50%)                | 1,113 (35.23%)             | 0.0002  |
| 50–59                      | 107 (38.77%)                      | 84 (32.06%)                | 76 (38.00%)                | 1,202 (38.05%)             |         |
| 60–69                      | 95 (34.42%)                       | 93 (35.50%)                | 61 (30.50%)                | 798 (25.26%)               |         |
| 70–79                      | 6 (2.17%)                         | 6 (2.29%)                  | 4 (2.00%)                  | 46 (1.46%)                 |         |
| BMI (kg/m <sup>2</sup> )   | 21.85 ± 0.13 <sup>c</sup>         | 22.40 ± 0.13 <sup>b</sup>  | 22.44 ± 0.16 <sup>b</sup>  | 22.77 ± 0.04 <sup>a</sup>  | <.0001  |
| < 18.5                     | 23 (8.33%)                        | 11 (4.20%)                 | 15 (7.50%)                 | 86 (2.72%)                 | <.0001  |
| 18.5–25                    | 227 (82.25%)                      | 220 (83.97%)               | 163 (81.50%)               | 2,497 (79.04%)             |         |
| ≥ 25                       | 26 (9.42%)                        | 31 (11.83%)                | 22 (11.00%)                | 576 (18.23%)               |         |
| Waist circumference (cm)   | 79.00 ± 0.36 <sup>b</sup>         | 79.93 ± 0.33 <sup>a</sup>  | 80.57 ± 0.42 <sup>a</sup>  | 80.48 ± 0.10 <sup>a</sup>  | 0.0003  |
| <b>Smoking</b>             |                                   |                            |                            |                            |         |
| Non-smoker                 | 145 (52.54%)                      | 131 (50.00%)               | 84 (42.00%)                | 1,024 (32.42%)             | <.0001  |
| Past smoker                | 110 (39.86%)                      | 99 (37.79%)                | 89 (44.50%)                | 1,199 (37.96%)             |         |
| Current smoker             | 18 (6.52%)                        | 31 (11.83%)                | 26 (13.00%)                | 924 (29.25%)               |         |
| Physical activity (yes, %) | 128 (46.38%)                      | 120 (45.80%)               | 87 (43.50%)                | 1,217 (38.52%)             | 0.0120  |
| <b>Educational level</b>   |                                   |                            |                            |                            |         |
| Under middle school        | 49 (17.75%)                       | 64 (24.43%)                | 52 (26.00%)                | 593 (18.77%)               | 0.1360  |
| High school                | 106 (38.41%)                      | 92 (35.11%)                | 72 (36.00%)                | 1,195 (37.83%)             |         |
| College or above           | 117 (42.39%)                      | 104 (39.69%)               | 76 (38.00%)                | 1,342 (42.48%)             |         |
| Drinking status (yes, %)   | 150 (54.35%)                      | 172 (65.65%)               | 134 (67.00%)               | 2,342 (74.14%)             | <.0001  |
| <b>Biomarkers</b>          |                                   |                            |                            |                            |         |
| TG (mg/dL)                 | 83.42 ± 1.72 <sup>a</sup>         | 87.08 ± 1.92 <sup>a</sup>  | 85.26 ± 2.20 <sup>a</sup>  | 88.37 ± 0.53 <sup>a</sup>  | 0.1906  |
| HDL-C (mg/dL)              | 54.80 ± 0.69 <sup>a</sup>         | 54.44 ± 0.66 <sup>a</sup>  | 54.67 ± 0.70 <sup>a</sup>  | 54.74 ± 0.19 <sup>a</sup>  | 0.8566  |
| FPG (mg/dL)                | 87.92 ± 0.42 <sup>a</sup>         | 88.38 ± 0.42 <sup>a</sup>  | 88.09 ± 0.49 <sup>a</sup>  | 88.22 ± 0.12 <sup>a</sup>  | 0.8835  |
| SBP (mmHg)                 | 115.05 ± 0.51 <sup>a</sup>        | 114.54 ± 0.56 <sup>a</sup> | 114.73 ± 0.61 <sup>a</sup> | 114.79 ± 0.15 <sup>a</sup> | 0.8464  |
| DBP (mmHg)                 | 72.53 ± 0.42 <sup>a</sup>         | 72.28 ± 0.41 <sup>a</sup>  | 72.08 ± 0.49 <sup>a</sup>  | 72.30 ± 0.12 <sup>a</sup>  | 0.8585  |
| <b>Women (N=10,725)</b>    |                                   |                            |                            |                            |         |
| N (incidence %)            | 1,119 (3.13%)                     | 697 (2.73%)                | 729 (3.16%)                | 8,180 (3.22%)              |         |
| Age (years)                | 52.37 ± 0.21 <sup>a</sup>         | 51.22 ± 0.26 <sup>b</sup>  | 50.90 ± 0.25 <sup>b</sup>  | 48.62 ± 0.07 <sup>c</sup>  | <.0001  |
| 40–49                      | 401 (35.84%)                      | 290 (41.61%)               | 316 (43.35%)               | 4,761 (58.20%)             | <.0001  |
| 50–59                      | 523 (46.74%)                      | 320 (45.91%)               | 324 (44.44%)               | 2,878 (35.18%)             |         |
| 60–69                      | 188 (16.80%)                      | 86 (12.34%)                | 85 (11.66%)                | 528 (6.45%)                |         |
| 70–79                      | 7 (0.63%)                         | 1 (0.14%)                  | 4 (0.55%)                  | 13 (0.16%)                 |         |
| BMI (kg/m <sup>2</sup> )   | 21.20 ± 0.06 <sup>c</sup>         | 21.60 ± 0.07 <sup>b</sup>  | 21.65 ± 0.07 <sup>ab</sup> | 21.78 ± 0.02 <sup>a</sup>  | <.0001  |
| < 18.5                     | 97 (8.67%)                        | 46 (6.60%)                 | 61 (8.37%)                 | 334 (4.08%)                | <.0001  |
| 18.5–25                    | 980 (87.58%)                      | 602 (86.37%)               | 628 (86.15%)               | 7,144 (87.33%)             |         |

|                            |                            |                            |                            |                            |        |
|----------------------------|----------------------------|----------------------------|----------------------------|----------------------------|--------|
| ≥ 25                       | 42 (3.75%)                 | 49 (7.03%)                 | 40 (5.49%)                 | 702 (8.58%)                |        |
| Waist circumference (cm)   | 71.59 ± 0.15 <sup>b</sup>  | 71.93 ± 0.18 <sup>ab</sup> | 72.14 ± 0.17 <sup>a</sup>  | 71.82 ± 0.05 <sup>ab</sup> | 0.1058 |
| Smoking                    |                            |                            |                            |                            |        |
| Non-smoker                 | 1,107 (98.93%)             | 685 (98.28%)               | 710 (97.39%)               | 7,902 (96.60%)             | 0.0019 |
| Past smoker                | 5 (0.45%)                  | 3 (0.43%)                  | 7 (0.96%)                  | 83 (1.01%)                 |        |
| Current smoker             | 5 (0.45%)                  | 5 (0.72%)                  | 10 (1.37%)                 | 158 (1.93%)                |        |
| Physical activity (yes, %) | 476 (42.54%)               | 287 (41.18%)               | 306 (41.98%)               | 3,208 (39.22%)             | 0.1098 |
| Educational level          |                            |                            |                            |                            |        |
| Under middle school        | 339 (30.29%)               | 188 (26.97%)               | 195 (26.75%)               | 1,497 (18.30%)             | <.0001 |
| High school                | 492 (43.97%)               | 344 (49.35%)               | 371 (50.89%)               | 4,046 (49.46%)             |        |
| College or above           | 272 (24.31%)               | 158 (22.67%)               | 160 (21.95%)               | 2,577 (31.50%)             |        |
| Drinking status (yes, %)   | 174 (15.55%)               | 178 (25.54%)               | 186 (25.51%)               | 3,366 (41.15%)             | <.0001 |
| Biomarkers                 |                            |                            |                            |                            |        |
| TG (mg/dL)                 | 77.43 ± 0.84 <sup>a</sup>  | 77.13 ± 1.08 <sup>a</sup>  | 76.61 ± 1.04 <sup>ab</sup> | 74.30 ± 0.31 <sup>b</sup>  | 0.0129 |
| HDL-C (mg/dL)              | 63.41 ± 0.31 <sup>a</sup>  | 63.69 ± 0.39 <sup>a</sup>  | 63.62 ± 0.38 <sup>a</sup>  | 64.32 ± 0.12 <sup>a</sup>  | 0.5571 |
| FPG (mg/dL)                | 86.13 ± 0.21 <sup>a</sup>  | 85.85 ± 0.28 <sup>a</sup>  | 85.86 ± 0.28 <sup>a</sup>  | 86.02 ± 0.08 <sup>a</sup>  | 0.7536 |
| SBP (mmHg)                 | 111.63 ± 0.30 <sup>a</sup> | 111.45 ± 0.37 <sup>a</sup> | 111.38 ± 0.35 <sup>a</sup> | 111.02 ± 0.11 <sup>a</sup> | 0.4572 |
| DBP (mmHg)                 | 69.66 ± 0.22 <sup>a</sup>  | 69.81 ± 0.27 <sup>a</sup>  | 69.33 ± 0.27 <sup>a</sup>  | 69.40 ± 0.08 <sup>a</sup>  | 0.3854 |

<sup>1</sup> *p* value of continuous variables (presented as mean ± standard error) was calculated using general linear models, and the *p* value of categorical variables (presented as n (%)) was calculated by chi-square test. The same alphabet in same treatment row shows insignificant differences based on Duncan test. Non-non: non-consumer both at baseline and follow-up; non-coffee: drinking coffee only at follow-up; coffee-non: drinking coffee only at baseline; coffee-coffee: drinking coffee both at baseline and at follow-up. Physical inactivity was defined as doing over 30 min exercise less than twice a week. BMI, body mass index; TG, triglyceride; HDL-C, high-density lipoprotein cholesterol; FPG, fasting plasma glucose; SBP, systolic blood pressure; DBP, diastolic blood pressure.

**Table S3.** Hazard ratios and 95% confidence intervals for MetS according to coffee consumption with or without additives by sex<sup>1</sup>.

|                             | Coffee type    |                     |                     |                        |                        |
|-----------------------------|----------------|---------------------|---------------------|------------------------|------------------------|
|                             | No             | Black               | 3-in-1              | Others                 |                        |
|                             |                |                     |                     | additives ≤ 1 teaspoon | additives > 1 teaspoon |
| Men (N=3,897)               | 276 (7.08%)    | 90 (2.31%)          | 610 (15.65%)        | 1,093 (28.05%)         | 1,828 (46.91%)         |
| MetS                        | Ref            | 0.679 (0.180–2.563) | 0.841 (0.398–1.778) | 1.015 (0.524–1.964)    | 0.692 (0.342–1.398)    |
| Abdominal obesity           | Ref            | 0.941 (0.357–2.480) | 0.955 (0.521–1.751) | 0.908 (0.522–1.578)    | 1.107 (0.632–1.937)    |
| High triglyceride           | Ref            | 1.479 (0.744–2.939) | 0.968 (0.594–1.578) | 1.096 (0.705–1.704)    | 0.904 (0.570–1.432)    |
| High blood pressure         | Ref            | 1.442 (0.916–2.270) | 0.812 (0.591–1.115) | 0.816 (0.619–1.076)    | 0.776 (0.579–1.040)    |
| Low HDL-cholesterol         | Ref            | 1.111 (0.433–2.849) | 0.358 (0.174–0.736) | 0.449 (0.253–0.796)    | 0.409 (0.222–0.752)    |
| High fasting plasma glucose | Ref            | 0.966 (0.600–1.556) | 0.636 (0.470–0.860) | 0.687 (0.530–0.891)    | 0.749 (0.571–0.984)    |
| Women (N=10,725)            | 1,119 (10.43%) | 548 (5.11%)         | 1,130 (10.54%)      | 4,401 (41.03%)         | 3,527 (32.89%)         |
| MetS                        | Ref            | 0.556 (0.281–1.099) | 0.549 (0.319–0.945) | 0.671 (0.450–1.000)    | 0.825 (0.536–1.269)    |
| Abdominal obesity           | Ref            | 0.874 (0.662–1.155) | 0.992 (0.796–1.236) | 0.941 (0.788–1.124)    | 1.034 (0.854–1.254)    |
| High triglyceride           | Ref            | 1.027 (0.680–1.551) | 0.855 (0.618–1.184) | 0.809 (0.633–1.033)    | 1.000 (0.761–1.314)    |
| High blood pressure         | Ref            | 1.172 (0.879–1.564) | 0.918 (0.724–1.163) | 0.824 (0.684–0.993)    | 0.907 (0.740–1.112)    |
| Low HDL-cholesterol         | Ref            | 1.157 (0.750–1.786) | 0.950 (0.673–1.340) | 0.787 (0.605–1.025)    | 1.157 (0.867–1.545)    |
| High fasting plasma glucose | Ref            | 1.367 (1.011–1.849) | 0.979 (0.759–1.263) | 1.000 (0.820–1.219)    | 1.077 (0.866–1.338)    |

<sup>1</sup> Hazard ratios and 95 % confidence intervals were calculated using Cox model after adjusting for continuous (age, BMI, and energy intake) and categorical (educational level, current drinking status, current smoking status, and physical activity) variables. MetS, metabolic syndrome; BMI, body mass index; HDL, high-density lipoprotein. High triglyceride, serum triglycerides ≥ 150 mg/dL; Low HDL-cholesterol, serum HDL-cholesterol < 40 mg/dL in men and < 50 mg/dL in women; Abdominal obesity, waist circumference ≥ 90 cm in men and ≥ 80 cm in women; High fasting plasma glucose, fasting plasma glucose ≥ 100 mg/dL; High blood pressure, systolic blood pressure ≥ 130 mmHg or diastolic blood pressure ≥ 85 mmHg. additives ≤ 1 teaspoon: adding sugar or creamer no more than 1 teaspoon. additives > 1 teaspoon: adding sugar or creamer over than 1 teaspoon.
